# Supplementary material for: Dead Ends, Lost Time: Rural Mobility Constraints
Source: Research Square preprint supplement (doi:10.21203/rs.3.rs-6871842/v1), 2025-09-16
Supplement: Supplementary file 1 [file 8c8ea4e29e9d0107dc0350fa.docx]

**Supplementary Information**

**List of Supplementary Figures**

[**Supplementary Fig. 1** Spatial distributions of study participants 2](#_Toc191821029)

**List of Supplementary Tables**

[**Supplementary Tab. 1** The number of study participants in each township. 3](#_Toc193131641)

[**Supplementary Tab. 2** Socioeconomic characteristics of study participants. 4](#_Toc193131642)

[**Supplementary Tab. 3** Travel time characteristics of study participants. 4](#_Toc193131643)

[**Supplementary Tab. 4** Overview of study variables and data sources. 5](#_Toc193131644)

[**Supplementary Tab. 5** Results of benchmark and sensitivity analysis. 6](#_Toc193131645)

[**Supplementary Tab. 6** Results of instrumental variable analysis. 6](#_Toc193131646)

[**Supplementary Tab. 7** Results of heterogeneity analysis by gender. 7](#_Toc193131647)

[**Supplementary Tab. 8** Results of heterogeneity analysis by age. 7](#_Toc193131648)

[**Supplementary Tab. 9** Results of heterogeneity analysis by household income. 8](#_Toc193131649)

[**Supplementary Tab. 10** Results of heterogeneity analysis by employment type. 9](#_Toc193131650)

[**Supplementary Tab. 11** Results of further analysis. 10](#_Toc193131651)

**
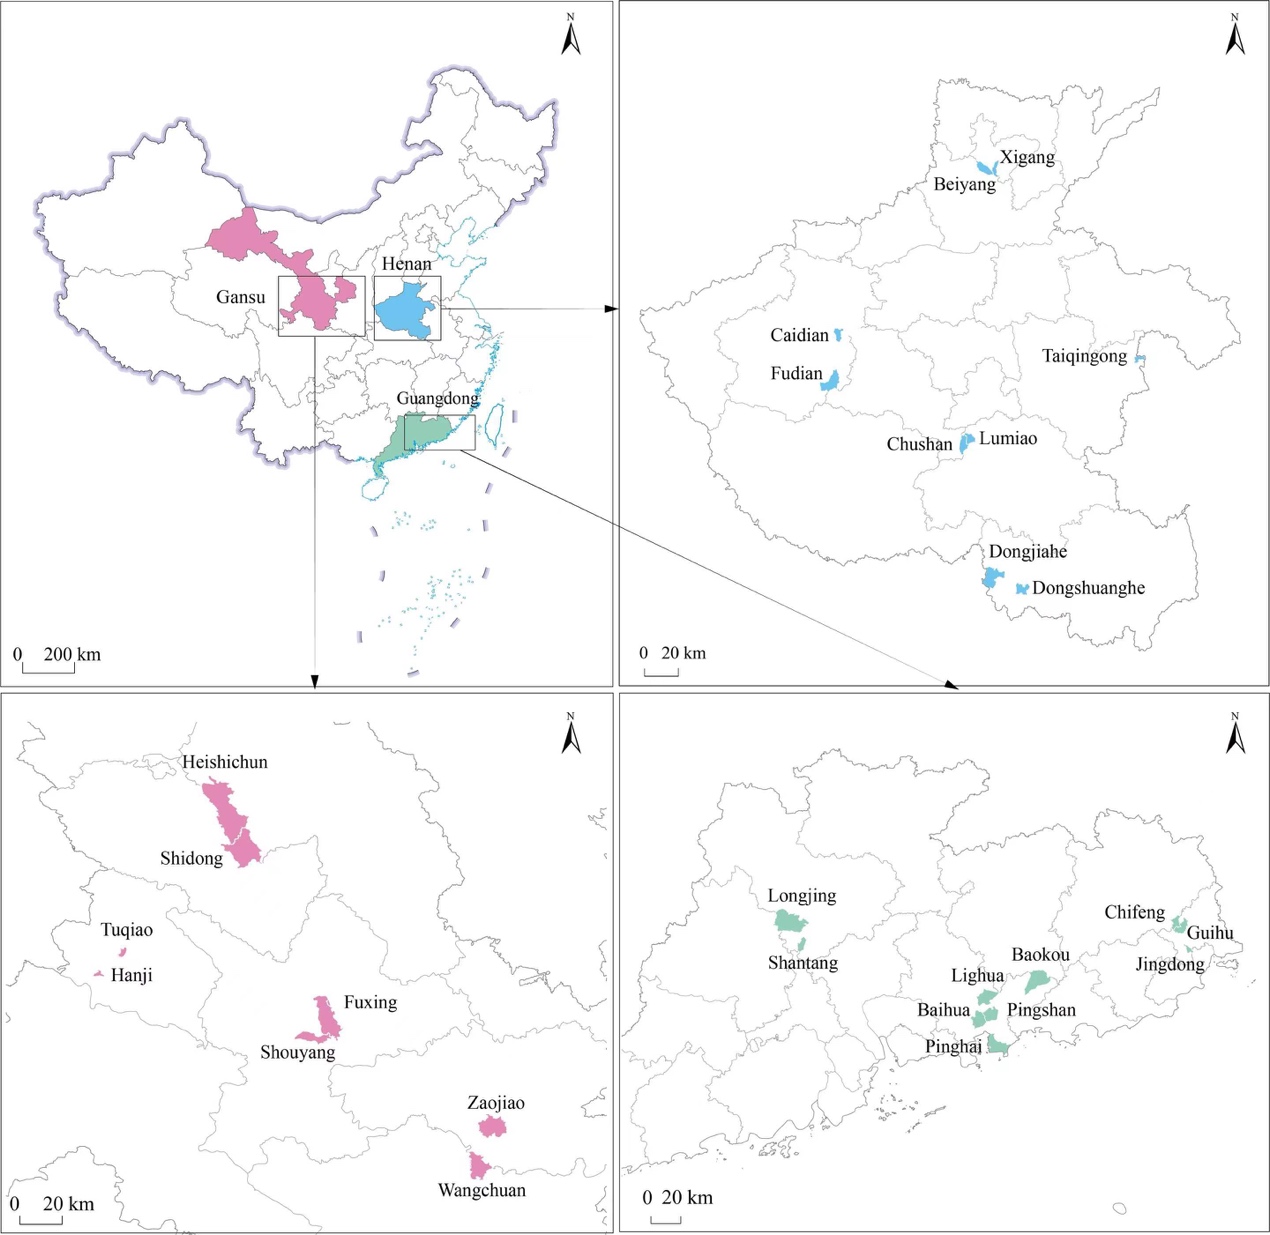
**

**Supplementary Fig. 1** Spatial distributions of study participants.

Note: Out of the 5,415 participants, 1,515 (28.0%) were from Guangdong, 2,531 (46.7%) were from Henan, and 1,369 (25.3%) were from Gansu.

**Supplementary Tab. 1** The number of study participants in each township.

| **Province** | **Township** | **N** | **Proportion** |
| --- | --- | --- | --- |
| Guangdong | Baihua | 97 | 1.8% |
| Baokou | 102 | 1.9% |
| Chifeng | 111 | 2.0% |
| Guihu | 168 | 3.1% |
| Jiangdong | 675 | 12.5% |
| Lianghua | 161 | 3.0% |
| Longjing | 66 | 1.2% |
| Pinghai | 45 | 0.8% |
| Pingshan | 15 | 0.3% |
| Shantang | 75 | 1.4% |
| Henan | Beiyang | 373 | 6.9% |
| Caidian | 239 | 4.4% |
| Chushan | 335 | 6.2% |
| Dongjiahe | 293 | 5.4% |
| Dongshuangh | 281 | 5.2% |
| Fudian | 253 | 4.7% |
| Lumiao | 278 | 5.1% |
| Taiqinggong | 189 | 3.5% |
| Xigang | 290 | 5.4% |
| Gansu | Fuxing | 221 | 4.1% |
| Hanji | 173 | 3.2% |
| Heishi | 140 | 2.6% |
| Shidong | 107 | 2.0% |
| Shouyang | 305 | 5.6% |
| Tuqiao | 107 | 2.0% |
| Wangchuan | 121 | 2.2% |
| Zaojiao | 195 | 3.6% |
| Total | | 5,415 | 100.0% |

**Supplementary Tab. 2** Socioeconomic characteristics of study participants.

| **Characteristics** | **Total** | **Guangdong** | **Henan** | **Gansu** |
| --- | --- | --- | --- | --- |
|  | Cases (%) / Mean (SD) | | | |
| Age | 49.1 (14.8) | 42.4 (14.4) | 53.0 (13.7) | 49.4 (14.4) |
| Gender |  |  |  |  |
| Male | 2,612 (48.2%) | 764 (49.6%) | 1,089 (43.0%) | 759 (44.6%) |
| Female | 2,803 (51.8%) | 751 (50.4%) | 1,442 (57.0%) | 610 (55.4%) |
| Years of education | 9.5 (3.4) | 11.0 (4.0) | 8.9 (2.7) | 8.9 (3.4) |
| Employment type |  |  |  |  |
| Full-time worker | 805 (14.9%) | 484 (32.0%) | 149 (5.9%) | 172 (12.6%) |
| Temporary worker | 852 (15.7%) | 269 (17.8%) | 401 (15.8%) | 182 (13.3%) |
| Self-employed worker | 472 (8.7%) | 168 (11.1%) | 257 (10.2%) | 47 (3.4%) |
| Farmer | 2,231 (41.2%) | 338 (22.3%) | 1,154 (45.6%) | 739 (54.0%) |
| Other | 1,055 (19.5%) | 256 (16.9%) | 570 (22.5%) | 229 (16.7%) |
| Self-reported health | 3.2 (1.0) | 3.3 (0.9) | 3.2 (1.0) | 3.0 (1.0) |
| Household annual income |  |  |  |  |
| Less than 29,999 CNY | 1,807 (33.4%) | 470 (31.0%) | 691 (26.5%) | 666 (48.7%) |
| 30,000 to 59,999 CNY | 1,702 (31.4%) | 435 (28.7%) | 868 (34.3%) | 399 (29.2%) |
| 60,000 to 89,999 CNY | 1,078 (19.9%) | 296 (19.5%) | 578 (22.8%) | 204 (14.9%) |
| More than 90,000 CNY | 828 (15.3%) | 314 (20.7%) | 414 (16.4%) | 100 (7.3%) |
| Household size | 4.9 (1.9) | 5.5 (2.1) | 4.5 (1.9) | 4.9 (1.7) |
| Presence of the elderly | 3,427 (63.3%) | 1,043 (68.8%) | 1,582 (62.5%) | 802 (58.6%) |
| Presence of children | 2,827 (52.2%) | 822 (54.3%) | 1,340 (52.9%) | 665 (48.6%) |
| Car ownership | 2,263 (41.8%) | 868 (57.3%) | 1,003 (39.6%) | 392 (28.6%) |
| Bicycle ownership | 3,098 (57.2%) | 570 (37.6%) | 2,040 (80.6%) | 488 (35.7%) |
| Motorcycle ownership | 1,724 (31.8%) | 949 (62.6%) | 430 (17.0%) | 345 (25.2%) |
| Tricycle ownership | 1,932 (35.7%) | 35 (2.3%) | 1,260 (49.8%) | 637 (46.5%) |

**Supplementary Tab. 3** Travel time characteristics of study participants.

| **Characteristics** | **N** | **Mean** | **SD** | **Min** | **P25** | **Median** | **P75** | **Max** |
| --- | --- | --- | --- | --- | --- | --- | --- | --- |
| Time of subsistence trips | 4,249 | 18.5 | 21.1 | 1.0 | 5.5 | 12.0 | 22.0 | 300.0 |
| Time of shopping trips to stores | 4,044 | 18.1 | 16.9 | 1.0 | 8.0 | 15.0 | 20.0 | 180.0 |
| Time of shopping trips to fairs | 3,925 | 15.0 | 13.7 | 1.0 | 5.0 | 10.0 | 20.0 | 150.0 |
| Time of visiting trips | 3,430 | 21.8 | 25.5 | 0.5 | 5.0 | 15.0 | 30.0 | 300.0 |
| Time of entertainment trips | 3,352 | 14.0 | 13.2 | 1.0 | 5.0 | 10.0 | 18.0 | 180.0 |

**Supplementary Tab. 4** Overview of study variables and data sources.

| **Variables (Unit)** | **Description** | **Mean (SD)** | **Data source** |
| --- | --- | --- | --- |
| Density of dead-end roads (km/km2) | The ratio of the length of dead-end roads to township area | 0.2 (0.1) | 2024 OSM |
| Population density (people/km2) | The ratio of the number of residents to township area | 479.5 (407.9) | 2023 LandScan |
| Road density (km/km2) | The ratio of total length of roads to township area | 1.8 (1.5) | 2024 OSM |
| Distance to county center (km) | The shortest distance from township to county center | 20.6 (12) | Cngcode package in Stata |
| Distance to city center (km) | The shortest distance from township to city center | 34.7 (21.9) | Cngcode package in Stata |
| Distance to highways (km) | The shortest distance from township center to the nearest roads (including highways, national and provincial roads) | 2.5 (3.1) | 2024 OSM |
| Distance to local roads (km) | The shortest distance from township center to the nearest roads (including county-level and township-level roads) | 1.4 (1.4) | 2024 OSM |
| # of healthcare facilates (count) | The number of hospitals and clinics | 26.1 (33) | 2024 Amap |
| # of schools (count) | The number of kindergartens and primary schools | 15.8 (12.2) | 2024 Amap |
| # of markets (count) | The number of markets | 26.1 (33) | 2024 Amap |
| # of bus stops (count) | The number of bus stops | 15.8 (12.2) | 2024 Amap |
| Slope (%) | Mean slope of township | 61.4 (74.4) | Copernicus DEM dataset |
| Temperature (°C) | Annual mean temperature of township | 0.3 (0.5) | TPDC |
| Precipitation (mm) | Annual rainfall of township | 8.7 (6.6) | TPDC |

Note: OSM denotes Open Street Map, DEM denotes digital elevation model, and TPDC denotes Tibetan Plateau Data Center.

**Supplementary Tab. 5** Results of benchmark and sensitivity analysis.

| **Model** | **Outcome variable** | **N** | **Estimate** | ***P*-value** | **Min95** | **Max95** | **SD** |
| --- | --- | --- | --- | --- | --- | --- | --- |
| **Benchmark analysis** | Time of subsistence trips | 4,249 | -0.301 | 0.960 | -12.039 | 11.436 | 5.989 |
| Time of shopping trips to stores | 4,044 | 21.481*** | 0.000 | 15.239 | 27.722 | 3.185 |
| Time of shopping trips to fairs | 3,925 | 18.956*** | 0.000 | 10.621 | 27.291 | 4.253 |
| Time of family visit trips | 3,430 | -2.523 | 0.680 | -14.513 | 9.468 | 6.118 |
| Time of entertainment trips | 3,352 | 15.156*** | 0.000 | 8.182 | 22.131 | 3.558 |
| **Sensitivity analysis 1** | Time of subsistence trips | 4,249 | 5.164 | 0.100 | -0.994 | 11.322 | 3.142 |
| Time of shopping trips to stores | 4,044 | 16.757*** | 0.000 | 10.872 | 22.643 | 3.003 |
| Time of shopping trips to fairs | 3,925 | 17.185*** | 0.000 | 8.437 | 25.932 | 4.463 |
| Time of family visit trips | 3,430 | -3.140 | 0.521 | -12.734 | 6.453 | 4.895 |
| Time of entertainment trips | 3,352 | 13.923*** | 0.000 | 7.049 | 20.796 | 3.507 |
| **Sensitivity analysis 2** | Time of subsistence trips | 4,234 | 3.461 | 0.382 | -4.306 | 11.227 | 3.962 |
| Time of shopping trips to stores | 4,034 | 23.854*** | 0.000 | 12.807 | 34.901 | 5.636 |
| Time of shopping trips to fairs | 3,917 | 20.917*** | 0.000 | 14.419 | 27.414 | 3.315 |
| Time of family visit trips | 3,423 | -1.710 | 0.738 | -11.743 | 8.322 | 5.119 |
| Time of entertainment trips | 3,340 | 18.010*** | 0.003 | 5.943 | 30.076 | 6.157 |
| **Sensitivity analysis 3** | Time of subsistence trips | 4,249 | 3.101 | 0.298 | -2.734 | 8.936 | 2.977 |
| Time of shopping trips to stores | 4,044 | 19.334*** | 0.000 | 13.359 | 25.308 | 3.048 |
| Time of shopping trips to fairs | 3,925 | 16.397*** | 0.000 | 8.849 | 23.944 | 3.851 |
| Time of family visit trips | 3,430 | -1.664 | 0.774 | -13.007 | 9.678 | 5.787 |
| Time of entertainment trips | 3,352 | 15.238*** | 0.000 | 7.592 | 22.884 | 3.901 |
| **Sensitivity analysis 4** | Time of subsistence trips | 4,249 | 2.646 | 0.257 | -1.934 | 7.226 | 2.337 |
| Time of shopping trips to stores | 4,044 | 12.196*** | 0.003 | 4.253 | 20.139 | 4.052 |
| Time of shopping trips to fairs | 3,925 | 11.577** | 0.040 | 0.541 | 22.613 | 5.631 |
| Time of family visit trips | 3,430 | -2.977 | 0.215 | -7.683 | 1.729 | 2.401 |
| Time of entertainment trips | 3,352 | 7.120*** | 0.000 | 3.686 | 10.554 | 1.752 |

Note: Min95 and Max95 denote 95% confidence interval, SD denotes clustered robust standard errors. * *p* < 0.1, ** *p* < 0.05, *** *p* < 0.01.

**Supplementary Tab. 6** Results of instrumental variable analysis.

| **Model** | **Outcome variable** | **N** | **Estimate** | ***P*-value** | **Min95** | **Max95** | **SD** |
| --- | --- | --- | --- | --- | --- | --- | --- |
| **Instrumental variable analysis** | Time of shopping trips to stores | 4,044 | 25.863** | 0.048 | 0.282 | 51.444 | 13.052 |
| Time of shopping trips to fairs | 3,925 | 31.207*** | 0.000 | 18.793 | 43.620 | 6.333 |
| Time of entertainment trips | 3,352 | 39.457*** | 0.000 | 23.785 | 55.129 | 7.996 |

Note: Min95 and Max95 denote 95% confidence interval, SD denotes clustered robust standard errors. * *p* < 0.1, ** *p* < 0.05, *** *p* < 0.01.

**Supplementary Tab. 7** Results of heterogeneity analysis by gender.

| **Model** | **Outcome variable** | **N** | **Estimate** | ***P*-value** | **Min95** | **Max95** | **SD** |
| --- | --- | --- | --- | --- | --- | --- | --- |
| **Male** | Time of subsistence trips | 2,125 | 9.803* | 0.075 | -0.974 | 20.580 | 5.499 |
| Time of shopping trips to stores | 1,885 | 20.962*** | 0.002 | 7.588 | 34.337 | 6.824 |
| Time of shopping trips to fairs | 1,802 | 14.347*** | 0.008 | 3.778 | 24.916 | 5.392 |
| Time of family visit trips | 1,599 | 0.003 | 1.000 | -14.810 | 14.816 | 7.558 |
| Time of entertainment trips | 1,637 | 11.398** | 0.042 | 0.423 | 22.373 | 5.600 |
| **Female** | Time of subsistence trips | 2,114 | 4.842 | 0.307 | -4.443 | 14.127 | 4.737 |
| Time of shopping trips to stores | 2,159 | 16.779*** | 0.000 | 9.604 | 23.955 | 3.661 |
| Time of shopping trips to fairs | 2,123 | 18.725*** | 0.001 | 7.642 | 29.808 | 5.655 |
| Time of family visit trips | 1,831 | -9.449 | 0.148 | -22.255 | 3.356 | 6.534 |
| Time of entertainment trips | 1,715 | 12.922*** | 0.006 | 3.711 | 22.132 | 4.699 |

Note: Min95 and Max95 denote 95% confidence interval, SD denotes clustered robust standard errors. * *p* < 0.1, ** *p* < 0.05, *** *p* < 0.01.

**Supplementary Tab. 8** Results of heterogeneity analysis by age.

| **Model** | **Outcome variable** | **N** | **Estimate** | ***P*-value** | **Min95** | **Max95** | **SD** |
| --- | --- | --- | --- | --- | --- | --- | --- |
| **Young adults** | Time of subsistence trips | 1,514 | -9.501 | 0.419 | -32.524 | 13.523 | 11.747 |
| Time of shopping trips to stores | 1,363 | 21.484*** | 0.007 | 5.888 | 37.081 | 7.958 |
| Time of shopping trips to fairs | 1,165 | 29.232*** | 0.000 | 18.156 | 40.307 | 5.651 |
| Time of family visit trips | 1,175 | 2.277 | 0.782 | -13.813 | 18.366 | 8.209 |
| Time of entertainment trips | 967 | 20.092*** | 0.002 | 7.537 | 32.647 | 6.406 |
| **The middle-aged** | Time of subsistence trips | 1,667 | -1.227 | 0.839 | -13.091 | 10.636 | 6.053 |
| Time of shopping trips to stores | 1,591 | 26.211*** | 0.000 | 16.455 | 35.967 | 4.978 |
| Time of shopping trips to fairs | 1,609 | 16.019*** | 0.000 | 7.300 | 24.737 | 4.448 |
| Time of family visit trips | 1,370 | -7.843 | 0.231 | -20.687 | 5.001 | 6.553 |
| Time of entertainment trips | 1,363 | 10.084*** | 0.008 | 2.663 | 17.505 | 3.786 |
| **The elderly** | Time of subsistence trips | 1,113 | 21.277*** | 0.002 | 7.939 | 34.615 | 6.805 |
| Time of shopping trips to stores | 1,135 | 22.701*** | 0.000 | 11.231 | 34.171 | 5.852 |
| Time of shopping trips to fairs | 1,189 | 21.205*** | 0.000 | 12.405 | 30.005 | 4.490 |
| Time of family visit trips | 924 | -3.663 | 0.778 | -29.143 | 21.816 | 13.000 |
| Time of entertainment trips | 1,058 | 16.124*** | 0.000 | 8.108 | 24.140 | 4.090 |

Note: Min95 and Max95 denote 95% confidence interval, SD denotes clustered robust standard errors. * *p* < 0.1, ** *p* < 0.05, *** *p* < 0.01.

**Supplementary Tab. 9** Results of heterogeneity analysis by household income.

| **Model** | **Outcome variable** | **N** | **Estimate** | ***P*-value** | **Min95** | **Max95** | **SD** |
| --- | --- | --- | --- | --- | --- | --- | --- |
| **Low** | Time of subsistence trips | 1,476 | 5.979 | 0.356 | -6.715 | 18.674 | 6.477 |
| Time of shopping trips to stores | 1,228 | 19.660*** | 0.002 | 6.980 | 32.340 | 6.469 |
| Time of shopping trips to fairs | 1,279 | 16.074** | 0.011 | 3.702 | 28.446 | 6.312 |
| Time of family visit trips | 1,018 | 4.845 | 0.491 | -8.947 | 18.637 | 7.037 |
| Time of entertainment trips | 897 | 19.316*** | 0.000 | 10.532 | 28.099 | 4.482 |
| **Middle** | Time of subsistence trips | 1,363 | -0.756 | 0.887 | -11.209 | 9.697 | 5.333 |
| Time of shopping trips to stores | 1,309 | 23.500*** | 0.000 | 15.515 | 31.484 | 4.074 |
| Time of shopping trips to fairs | 1,251 | 10.588** | 0.022 | 1.494 | 19.682 | 4.640 |
| Time of family visit trips | 1,085 | -11.212 | 0.174 | -27.385 | 4.960 | 8.251 |
| Time of entertainment trips | 1,105 | 8.967 | 0.125 | -2.483 | 20.417 | 5.842 |
| **Upper-middle** | Time of subsistence trips | 831 | 16.584*** | 0.006 | 4.646 | 28.523 | 6.091 |
| Time of shopping trips to stores | 850 | 25.318*** | 0.002 | 9.381 | 41.255 | 8.131 |
| Time of shopping trips to fairs | 792 | 25.826*** | 0.000 | 13.641 | 38.011 | 6.217 |
| Time of family visit trips | 737 | 10.455 | 0.268 | -8.043 | 28.953 | 9.438 |
| Time of entertainment trips | 764 | 15.111*** | 0.004 | 4.895 | 25.326 | 5.212 |
| **High** | Time of subsistence trips | 579 | 8.045 | 0.647 | -26.418 | 42.508 | 17.583 |
| Time of shopping trips to stores | 657 | 11.523 | 0.127 | -3.281 | 26.327 | 7.553 |
| Time of shopping trips to fairs | 603 | 31.479*** | 0.000 | 15.462 | 47.496 | 8.172 |
| Time of family visit trips | 590 | -32.667** | 0.021 | -60.326 | -5.008 | 14.112 |
| Time of entertainment trips | 586 | 15.215** | 0.029 | 1.525 | 28.905 | 6.985 |

Note: Min95 and Max95 denote 95% confidence interval, SD denotes clustered robust standard errors. * *p* < 0.1, ** *p* < 0.05, *** *p* < 0.01.

**Supplementary Tab. 10** Results of heterogeneity analysis by employment type.

| **Model** | **Outcome variable** | **N** | **Estimate** | ***P*-value** | **Min95** | **Max95** | **SD** |
| --- | --- | --- | --- | --- | --- | --- | --- |
| **Full-time** | Time of subsistence trips | 795 | 21.932 | 0.108 | -4.820 | 48.684 | 13.649 |
| Time of shopping trips to stores | 585 | 42.643** | 0.025 | 5.362 | 79.925 | 19.021 |
| Time of shopping trips to fairs | 456 | 42.215** | 0.011 | 9.528 | 74.902 | 16.677 |
| Time of family visit trips | 506 | 24.233* | 0.070 | -2.021 | 50.487 | 13.395 |
| Time of entertainment trips | 441 | 13.964 | 0.100 | -2.694 | 30.622 | 8.499 |
| **Temporary** | Time of subsistence trips | 826 | -12.236 | 0.447 | -43.760 | 19.288 | 16.084 |
| Time of shopping trips to stores | 635 | 17.125** | 0.074 | -1.649 | 35.900 | 9.579 |
| Time of shopping trips to fairs | 607 | 25.397*** | 0.003 | 8.761 | 42.032 | 8.488 |
| Time of family visit trips | 544 | -6.468 | 0.666 | -35.796 | 22.861 | 14.964 |
| Time of entertainment trips | 572 | 35.778*** | 0.000 | 22.113 | 49.444 | 6.972 |
| **Self-employed** | Time of subsistence trips | 137 | -3.336 | 0.695 | -19.986 | 13.314 | 8.495 |
| Time of shopping trips to stores | 368 | 61.761*** | 0.001 | 24.822 | 98.700 | 18.847 |
| Time of shopping trips to fairs | 355 | 46.220*** | 0.002 | 16.350 | 76.091 | 15.240 |
| Time of family visit trips | 350 | 8.449 | 0.661 | -29.273 | 46.171 | 19.246 |
| Time of entertainment trips | 362 | 19.688* | 0.099 | -3.720 | 43.097 | 11.943 |
| **Farming** | Time of subsistence trips | 2,222 | 4.825 | 0.228 | -3.015 | 12.666 | 4.000 |
| Time of shopping trips to stores | 1,664 | 16.835*** | 0.000 | 7.981 | 25.689 | 4.517 |
| Time of shopping trips to fairs | 1,770 | 14.909*** | 0.000 | 7.326 | 22.491 | 3.869 |
| Time of family visit trips | 1,377 | -4.742 | 0.442 | -16.837 | 7.353 | 6.171 |
| Time of entertainment trips | 1,360 | 5.437* | 0.052 | -0.058 | 10.932 | 2.804 |
| **Other** | Time of subsistence trips | 269 | -38.007 | 0.186 | -94.305 | 18.291 | 28.724 |
| Time of shopping trips to stores | 792 | 30.186*** | 0.010 | 7.318 | 53.055 | 11.668 |
| Time of shopping trips to fairs | 737 | 20.776*** | 0.000 | 9.922 | 31.629 | 5.538 |
| Time of family visit trips | 653 | -2.966 | 0.823 | -28.912 | 22.980 | 13.238 |
| Time of entertainment trips | 617 | 20.374*** | 0.010 | 4.887 | 35.862 | 7.902 |

Note: Min95 and Max95 denote 95% confidence interval, SD denotes clustered robust standard errors. * *p* < 0.1, ** *p* < 0.05, *** *p* < 0.01.

**Supplementary Tab. 11** Results of further analysis.

| **Model** | **Outcome variable** | **N** | **Estimate** | ***P*-value** | **Min95** | **Max95** | **SD** |
| --- | --- | --- | --- | --- | --- | --- | --- |
| **Number of dead-end roads** | Time of subsistence trips | 4,249 | 0.006 | 0.537 | -0.012 | 0.023 | 0.009 |
| Time of shopping trips to stores | 4,044 | 0.022*** | 0.002 | 0.008 | 0.035 | 0.007 |
| Time of shopping trips to fairs | 3,925 | 0.010* | 0.060 | 0.000 | 0.021 | 0.005 |
| Time of family visit trips | 3,430 | -0.007 | 0.399 | -0.023 | 0.009 | 0.008 |
| Time of entertainment trips | 3,352 | 0.020*** | 0.000 | 0.011 | 0.030 | 0.005 |
| **Length of dead-end roads** | Time of subsistence trips | 4,249 | 0.096*** | 0.001 | 0.041 | 0.151 | 0.028 |
| Time of shopping trips to stores | 4,044 | 0.086*** | 0.001 | 0.036 | 0.136 | 0.025 |
| Time of shopping trips to fairs | 3,925 | 0.069*** | 0.000 | 0.046 | 0.091 | 0.012 |
| Time of family visit trips | 3,430 | 0.032 | 0.177 | -0.014 | 0.077 | 0.023 |
| Time of entertainment trips | 3,352 | 0.027 | 0.332 | -0.027 | 0.080 | 0.027 |
| **Proportion of the number of dead-end roads** | Time of subsistence trips | 4,249 | -0.184*** | 0.000 | -0.282 | -0.087 | 0.050 |
| Time of shopping trips to stores | 4,044 | 0.270*** | 0.000 | 0.191 | 0.350 | 0.041 |
| Time of shopping trips to fairs | 3,925 | 0.178** | 0.011 | 0.041 | 0.314 | 0.070 |
| Time of family visit trips | 3,430 | -0.053 | 0.383 | -0.172 | 0.066 | 0.061 |
| Time of entertainment trips | 3,352 | 0.163*** | 0.000 | 0.097 | 0.229 | 0.034 |
| **Proportion of the length of dead-end roads** | Time of subsistence trips | 4,249 | -0.174*** | 0.006 | -0.297 | -0.051 | 0.063 |
| Time of shopping trips to stores | 4,044 | 0.265*** | 0.006 | 0.074 | 0.456 | 0.097 |
| Time of shopping trips to fairs | 3,925 | 0.239*** | 0.000 | 0.126 | 0.353 | 0.058 |
| Time of family visit trips | 3,430 | -0.054 | 0.513 | -0.217 | 0.109 | 0.083 |
| Time of entertainment trips | 3,352 | 0.116* | 0.066 | -0.008 | 0.239 | 0.063 |
| **The ratio of the number of dead-end roads to township area** | Time of subsistence trips | 4,249 | -1.935*** | 0.000 | -2.885 | -0.984 | 0.485 |
| Time of shopping trips to stores | 4,044 | 1.937** | 0.021 | 0.296 | 3.578 | 0.837 |
| Time of shopping trips to fairs | 3,925 | 2.181*** | 0.002 | 0.820 | 3.541 | 0.694 |
| Time of family visit trips | 3,430 | -1.702* | 0.074 | -3.572 | 0.168 | 0.954 |
| Time of entertainment trips | 3,352 | 0.721 | 0.275 | -0.572 | 2.014 | 0.660 |

Note: Min95 and Max95 denote 95% confidence interval, SD denotes clustered robust standard errors. * *p* < 0.1, ** *p* < 0.05, *** *p* < 0.01.
